# Supplementary material for: A platform for precise quantification of gene editing products based on microfluidic chip-based digital PCR
Source: Royal Society of Chemistry journal article supplement (doi:10.1039/d4ay00863d), 2024-01-01
Supplement: d4ay00863d1.pdf [file d4ay00863d1.pdf]

Supplementary information

**Novel platform for precise quantification of gene editing products  
based on microfluidic chip-based digital PCR**

Jingzheng Chi <sup>a, b, §</sup>; Lin Ding <sup>a b, §</sup>; Xiaofu Wang <sup>b</sup>; Xiaoyun Chen <sup>b</sup>; Cheng Peng <sup>b, \*</sup>;  
Junfeng Xu <sup>b, \*</sup>

<sup>a</sup> College of Advanced Agricultural Sciences, Zhejiang Agriculture and Forestry University, Hangzhou 311300, China

<sup>b</sup> State Key Laboratory for Managing Biotic and Chemical Threats to the Quality and Safety of Agro-products, Key Laboratory of Traceability for Agricultural Genetically Modified Organisms, Ministry of Agriculture and Rural Affairs, Zhejiang Academy of Agricultural Sciences, Hangzhou 310021, China

§. These authors contributed equally to this work.

\* Corresponding author.

E-mail: [pc\\_phm@163.com](mailto:pc_phm@163.com) (Cheng Peng);

[njfxu@163.com](mailto:njfxu@163.com) (Junfeng Xu), Telephone: +86-0571-86415202;

## Supplementary Tables

**Table S1** The information of Primers and probes used in the study

| Species               | Primers and Probes | Sequence information (5'-3')  |
|-----------------------|--------------------|-------------------------------|
| <i>Oryza sativa</i>   | F-primer           | TCGCGCTCATTGTCTTCCT           |
|                       | R-primer           | TGGTCTTGAACATTCTCGTTGTG       |
|                       | FAM-1              | CCCCTACTGCCGCCG               |
|                       | FAM-2              | CGTCCCCTACTGCCGCCG            |
|                       | FAM-3              | CCCTACTGCCGCCGCCA             |
|                       | HEX-1              | TGCTGCTCTCGCCGTCCCCT          |
|                       | HEX-2              | CTGCTCTCGCCGTCC               |
|                       | <i>Glycine max</i> | F-primer                      |
| R-primer              |                    | CGTAAGAGATTAAATTAGCAGGAAAACC  |
| HEX                   |                    | AAGCAAGAGACGTTCTA             |
| FAM                   |                    | AGGTGGAAAGGTTTTTC             |
| <i>Brassica napus</i> | F1-primer          | CGACCTTCCTGGTCCGTAATC         |
|                       | R1-primer          | GCTTGGCAAGAACGGAGAAG          |
|                       | FAM                | TTGCCCATGCTGGCT               |
|                       | F2-primer          | GGCCAGGGCTTCCGTGAT            |
|                       | R2-primer          | CCGTCGTTGTAGAACCATTGG         |
|                       | HEX                | AGTCCTTATGTGCTCCACTTTCTGGTGCA |

**Table S2** The source of gene-edited plants used in this study

| species               | Sample number | Genotype     |            | theoretical ratio values | expected ratio values |
|-----------------------|---------------|--------------|------------|--------------------------|-----------------------|
| <i>Oryza sativa</i>   | WT            | Wild-type    |            | 100%                     | 99.17%                |
|                       | S-1           | Heterozygous |            | 50%                      | 49.44%                |
|                       | S-2           | Heterozygous |            | 50%                      | 49.11%                |
|                       | S-3           | Heterozygous |            | 50%                      | 51.06%                |
|                       | S-4           | Homozygous   |            | 0%                       | 0%                    |
|                       | S-5           | Homozygous   |            | 0%                       | 0%                    |
| <i>Glycine max</i>    | D-1           | Heterozygous |            | 10%                      | 10.19%                |
|                       | D-2           | Wild-type    |            | 100%                     | 100%                  |
| <i>Brassica napus</i> |               | A-genome     | C-genome   |                          |                       |
|                       | Y-1           | Heterozygous | Homozygous | 75%                      | 75%                   |
|                       | Y-2           | Heterozygous | WT-type    | 25%                      | 24.92%                |

**Table S3** The source of gene-edited *Brassica napus* and *Glycine max* used in this study

| species               | Sample number | the target genes edited                                      |
|-----------------------|---------------|--------------------------------------------------------------|
| <i>Brassica napus</i> | WT            | (A-genome) GGCCACTTGCCCATGCTGGCTAAGTACGGCCCTGACGT            |
|                       | WT            | (C-genome) GGCCACTTGCCCATGCTGGCTAAGTACGGCCCTGACCT            |
| <i>Brassica napus</i> | Y-1           | (A-genome) GGCCACTT <b>TT</b> GCCCATGCTGGCTAAGTACGGCCCTGACGT |
|                       |               | (C-genome) GGCCACTT <b>TT</b> GCCCATGCTGGCTAAGTACGGCCCTGACCT |
|                       | Y-2           | (A-genome) GGCCACTT <b>G</b> GCCCATGCTGGCTAAGTACGGCCCTGACGT  |
|                       |               | (C-genome) GGCCACTTGCCCATGCTGGCTAAGTACGGCCCTGACCT            |
| <i>Glycine max</i>    | D-1           | GAAGCAAGAA <b>AT</b> GTTCTAGG                                |
|                       | D-2           | GAAGCAAGAGACGTTCTAGG                                         |

**Table S4** The results of cdPCR and ddPCR for detecting diluted samples

| Samples<br>(ng/ $\mu$ L) | cdPCR (Copies/ $\mu$ L) |               |               |                           |            | ddPCR (Copies/ $\mu$ L) |               |               |                           |            |
|--------------------------|-------------------------|---------------|---------------|---------------------------|------------|-------------------------|---------------|---------------|---------------------------|------------|
|                          | Parallel<br>1           | Parallel<br>2 | Parallel<br>3 | Mean $\pm$ error<br>value | RSD<br>(%) | Parallel<br>1           | Parallel<br>2 | Parallel<br>3 | Mean $\pm$ error<br>value | RSD<br>(%) |
| 10                       | 2083                    | 2077.3        | 2079          | 2079.77 $\pm$ 2.39        | 0.11       | 2093                    | 2111          | 2124          | 2109.33 $\pm$ 12.71       | 0.60       |
| 5                        | 1082.5                  | 1076.7        | 1072.2        | 1077.13 $\pm$ 4.22        | 0.39       | 1116                    | 1103          | 1089          | 1102.67 $\pm$ 11.03       | 1.00       |
| 1                        | 188.44                  | 186.14        | 192.3         | 188.96 $\pm$ 2.54         | 1.34       | 216                     | 223           | 219           | 219.33 $\pm$ 2.87         | 1.31       |
| 0.2                      | 40.42                   | 42.09         | 41.91         | 41.47 $\pm$ 0.75          | 1.81       | 40.2                    | 41.1          | 40.5          | 40.6 $\pm$ 0.37           | 0.91       |
| 0.04                     | 8.06                    | 8.25          | 8.11          | 8.14 $\pm$ 0.08           | 0.98       | 8.7                     | 9.2           | 8.4           | 8.77 $\pm$ 0.33           | 3.76       |
| 0.008                    | 8.77                    | 8.52          | 8.08          | 8.46 $\pm$ 0.29           | 3.43       | 6.4                     | 12.9          | 9.9           | 9.73 $\pm$ 2.66           | 27.34      |

**Table S5** Results of Mixed Sample Assayed by cdPCR

| sample | HEX (Copies/ $\mu$ L) |               |               |                           |            | HEX-FAM (Copies/ $\mu$ L) |               |               |                           |            | mutation  |
|--------|-----------------------|---------------|---------------|---------------------------|------------|---------------------------|---------------|---------------|---------------------------|------------|-----------|
|        | Parallel<br>1         | Parallel<br>2 | Parallel<br>3 | Mean $\pm$ error<br>value | RSD<br>(%) | Parallel<br>1             | Parallel<br>2 | Parallel<br>3 | Mean $\pm$ error<br>value | RSD<br>(%) | frequency |
| WT     | 7282.8                | 7287.7        | 7347.7        | 7306.067 $\pm$ 29.507     | 0.40       | 7267.6                    | 7289.5        | 7296.7        | 7284.6 $\pm$ 15.156       | 0.21       | WT        |
| 50.00% | 7260.6                | 7261.9        | 7220.3        | 7247.6 $\pm$ 19.311       | 0.27       | 3587.1                    | 3606.2        | 3624          | 3605.767 $\pm$ 18.454     | 0.51       | 49.751%   |
| 10.00% | 7470                  | 7465.9        | 7498.3        | 7478.0667 $\pm$ 14.404    | 0.19       | 776.6                     | 772.4         | 775.8         | 774.933 $\pm$ 2.230       | 0.29       | 10.363%   |
| 5.00%  | 7328.4                | 7283.6        | 7247.6        | 7286.533 $\pm$ 33.052     | 0.45       | 371.1                     | 369.6         | 372.8         | 371.167 $\pm$ 1.601       | 0.43       | 5.094%    |
| 1.00%  | 7347.7                | 7282.8        | 7317.7        | 7316.067 $\pm$ 26.521     | 0.36       | 77.7                      | 80.6          | 84.4          | 80.9 $\pm$ 3.360          | 4.15       | 1.109%    |
| 0.50%  | 7296                  | 7253.6        | 7306.2        | 7285.267 $\pm$ 22.776     | 0.31       | 37.1                      | 38.7          | 36.8          | 37.533 $\pm$ 1.021        | 2.72       | 0.515%    |
| 0.10%  | 7282.8                | 7187.7        | 7247.7        | 7239.4 $\pm$ 39.266       | 0.54       | 7.2                       | 7.7           | 7.4           | 7.433 $\pm$ 0.252         | 3.39       | 0.103%    |
| 0.05%  | 7217.9                | 7214.3        | 7258.5        | 7230.233 $\pm$ 20.042     | 0.28       | 8.2                       | 4.8           | 6.6           | 6.533 $\pm$ 1.700         | 26.04      | 0.090%    |

**Table S6** Results of Mixed Sample Assayed by ddPCR

| sample | HEX (Copies/ $\mu$ L) |            |            |                        |         | HEX-FAM (Copies/ $\mu$ L) |            |            |                        |         | mutation frequency |
|--------|-----------------------|------------|------------|------------------------|---------|---------------------------|------------|------------|------------------------|---------|--------------------|
|        | parallel 1            | Parallel 2 | Parallel 3 | Mean $\pm$ error value | RSD (%) | Parallel 1                | Parallel 2 | Parallel 3 | Mean $\pm$ error value | RSD (%) |                    |
| WT     | 7300                  | 7320       | 7290       | 7303.333 $\pm$ 12.472  | 0.171%  | 7300                      | 7280       | 7340       | 7306.667 $\pm$ 24.944  | 0.75    | WT                 |
| 50.00% | 7310                  | 7390       | 7280       | 7326.667 $\pm$ 46.428  | 0.634%  | 3620                      | 3580       | 3650       | 3616.667 $\pm$ 28.6745 | 0.79    | 49.363%            |
| 10.00% | 7240                  | 7310       | 7320       | 7290 $\pm$ 35.59       | 0.488%  | 760                       | 755        | 720        | 745 $\pm$ 17.795       | 2.39    | 10.219%            |
| 5.00%  | 7190                  | 7260       | 7230       | 7226.667 $\pm$ 28.674  | 0.397%  | 375                       | 380        | 391        | 382 $\pm$ 6.683        | 1.75    | 5.286%             |
| 1.00%  | 7340                  | 7290       | 7360       | 7330 $\pm$ 29.439      | 0.402%  | 80                        | 77         | 71         | 76 $\pm$ 3.742         | 4.92    | 1.037%             |
| 0.50%  | 7270                  | 7250       | 7330       | 7283.333 $\pm$ 33.9935 | 0.467%  | 38                        | 37.4       | 33.3       | 36.233 $\pm$ 2.089     | 5.76    | 0.497%             |
| 0.10%  | 7350                  | 7330       | 7290       | 7323.333 $\pm$ 24.944  | 0.341%  | 7.5                       | 7.25       | 8.5        | 7.75 $\pm$ 0.540       | 6.97    | 0.106%             |
| 0.05%  | 7290                  | 7330       | 7370       | 7330 $\pm$ 32.6599     | 0.446%  | 3                         | 7.8        | 7.2        | 6 $\pm$ 2.135          | 35.59   | 0.082%             |

Supplementary Figures

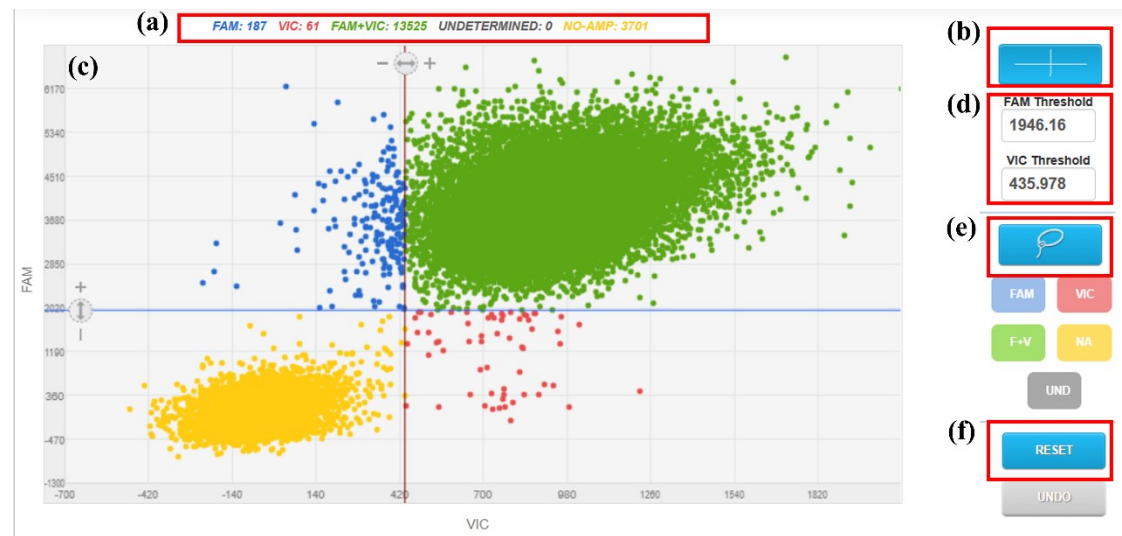

**Fig S1** cdPCR operating page features: **(a)** Quality Threshold Requirement; **(b)** Automatic Threshold Segmentation; **(c)** Manual Droplet Illustration with Threshold Setting; **(d)** Box Selection Tool; **(e)** Restore Tool;



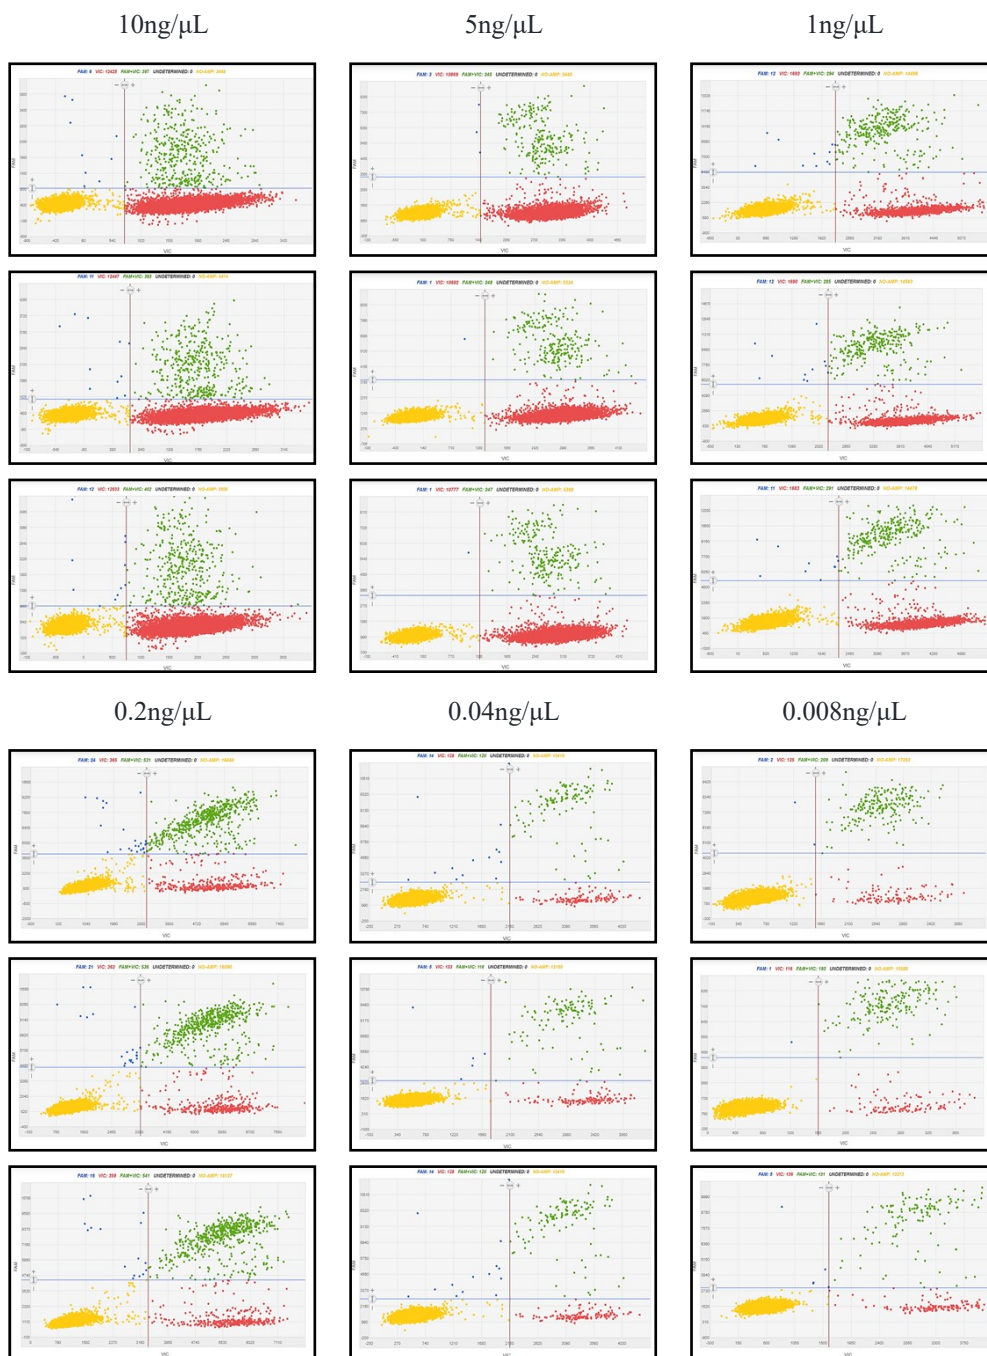

**Fig S2** Droplet amplification plot of diluted samples detected by cdPCR. In each experiment, three biological replicates are performed.

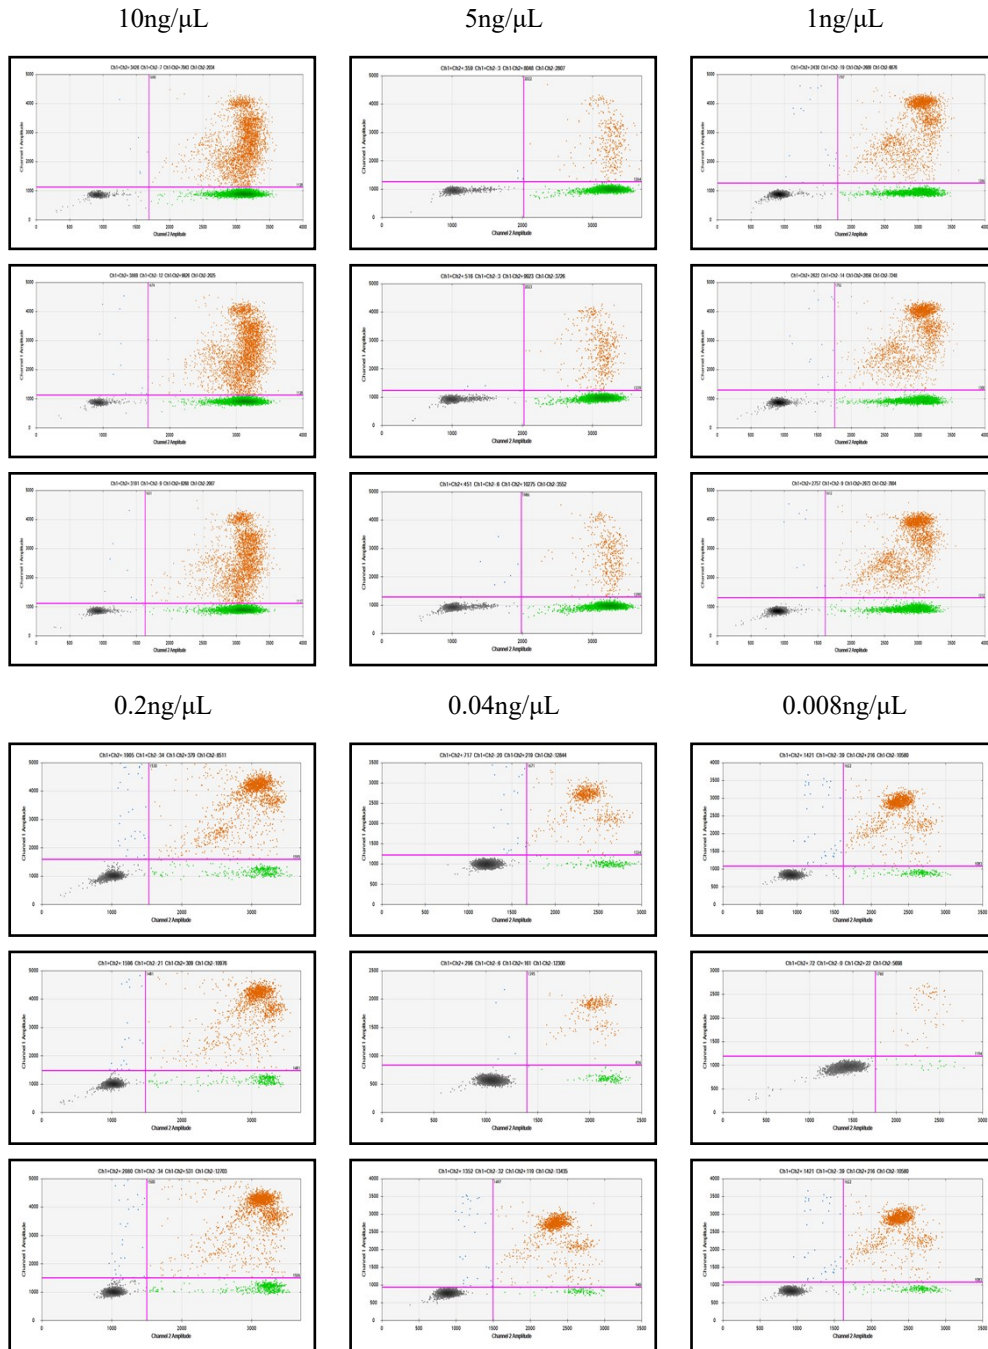

**Fig S3** Droplet amplification plot of diluted samples detected by ddPCR. In each experiment, three biological replicates are performed.

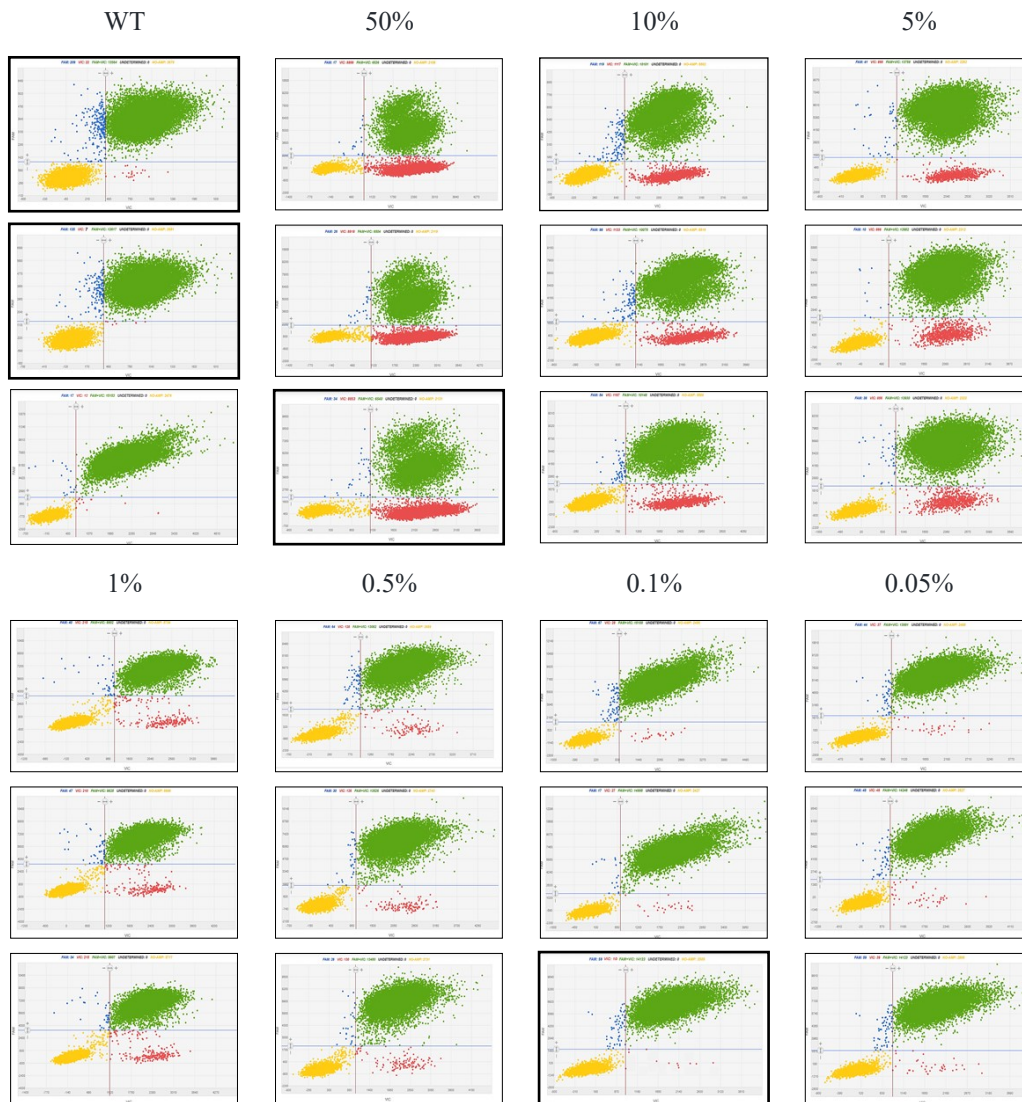

**Fig S4** Droplet amplification plots of various mixed samples detected by cdPCR. In each experiment, three biological replicates are performed.

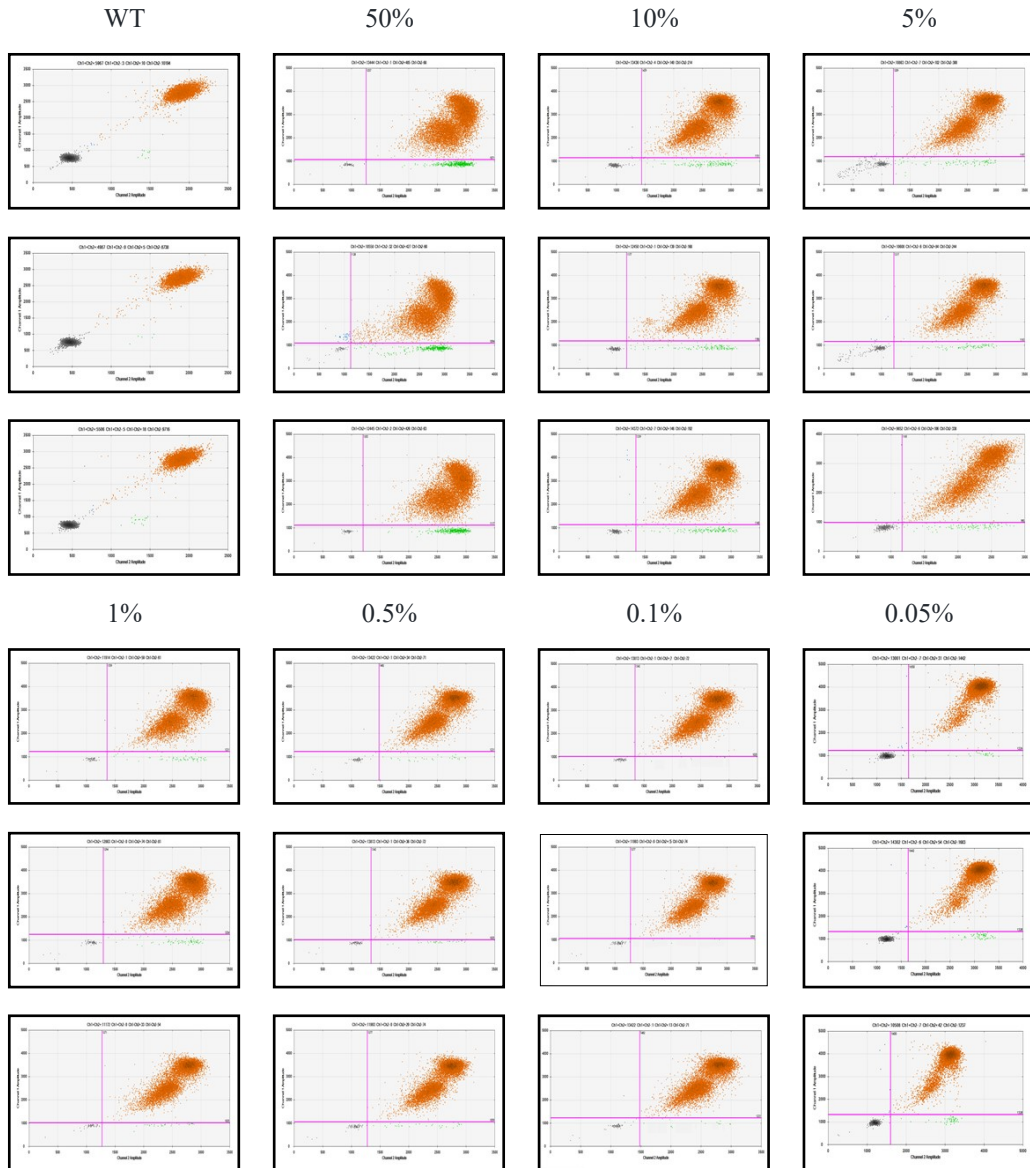

**Fig S5** Droplet amplification plots of various mixed samples detected by ddPCR. In each experiment, three biological replicates are performed.

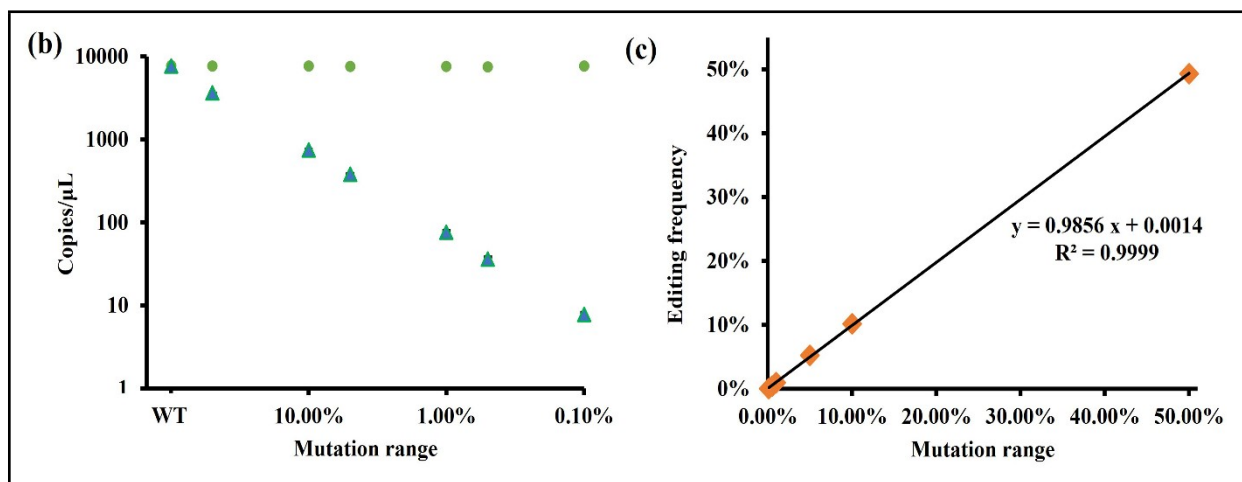

**Fig S6(a)** Scatter plot showing copy number values and mutation range of different mixed samples detected by ddPCR: green dots and blue triangles represent the concentration of HEX droplets and FAM droplets in each mixed sample, respectively; **(b)** Standard curve showing the editing efficiency determined by ddPCR for different mutation ranges. All data are the average of three replicates  $\pm$  error value.
